# Supplementary material
Source: PubMed Central journal article supplement (PMC6842426)
Supplement: NIHMS1536166-supplement-1.pdf [file NIHMS1536166-supplement-1.pdf]

Figure S1 - Højfeldt et al.

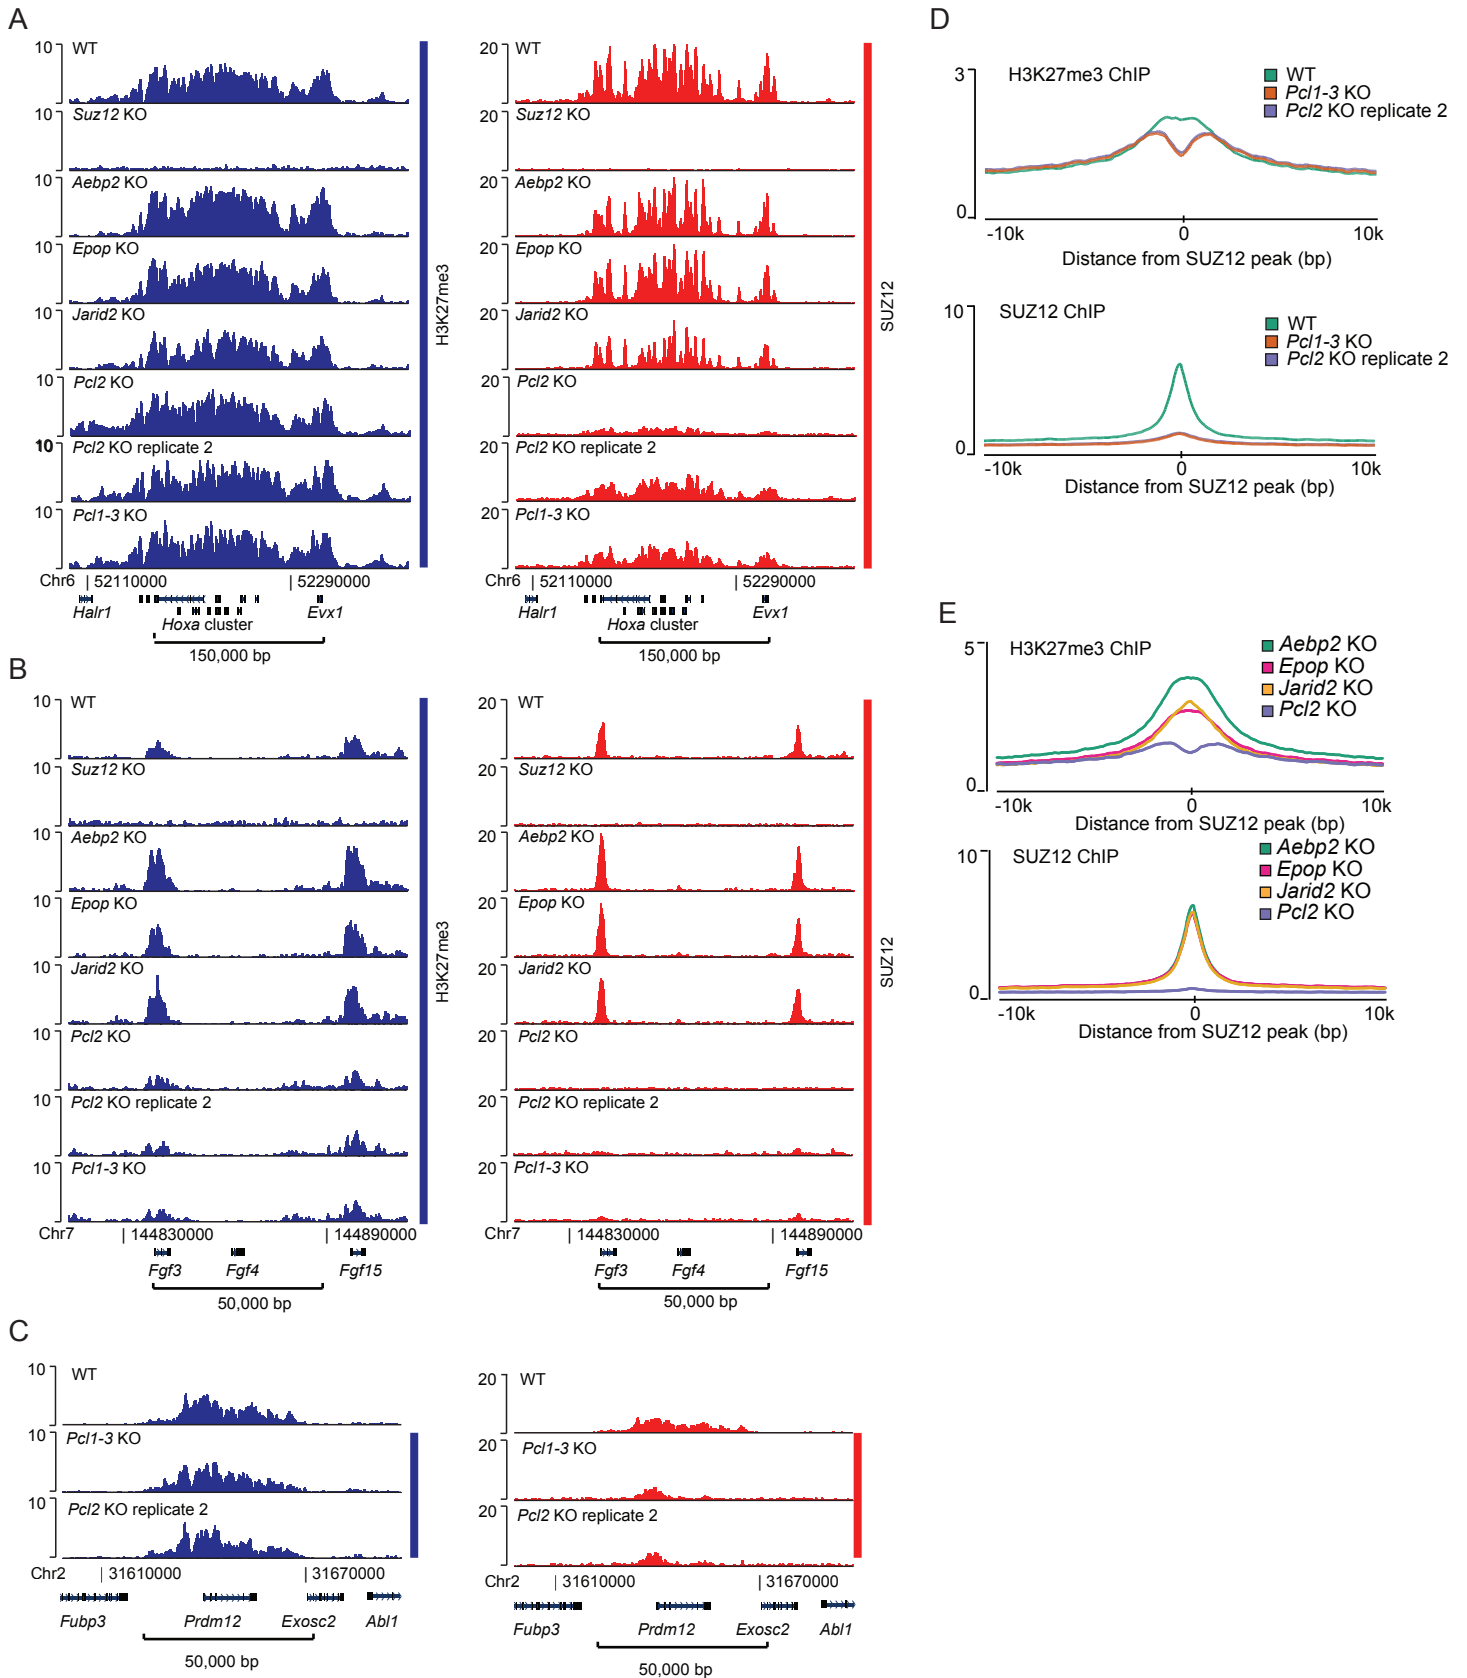

**Figure S1: Individual non-core PRC2 subunits are dispensable for target site specificity.**  
**Related to Figure 1.**

A) H3K27me3 and SUZ12 ChIP-seq signals (RPKM) from the indicated cell lines in a region spanning the *Hoxa* gene cluster. *Pcl2* KO replicate 2 data was generated in parallel with *Pcl1-3* KO.

B) H3K27me3 and SUZ12 ChIP-seq signals (RPKM) from the indicated cell lines in a region that includes the CGI-promoter genes *Fgf3*, *Fgf15* (repressed) and *Fgf4* (active). *Pcl2* KO replicate 2 data was generated in parallel with *Pcl1-3* KO.

C) H3K27me3 and SUZ12 ChIP-seq signals (RPKM) region including the PRC2 target gene *Prdm12*. *Pcl2* KO replicate 2 data was generated in parallel with *Pcl1-3* KO.

D) Mean H3K27me3 (top) and SUZ12 (bottom) ChIP-seq signals (RPKM) for WT, *Pcl1-3* KO and *Pcl2* KO (replicate 2) cell lines in regions centered on 7,796 SUZ12 peak regions identified in WT mESCs.

E) Mean H3K27me3 (top) and SUZ12 (bottom) ChIP-seq signals (RPKM) for *Aebp2*, *Epop* KO, *Jarid2* KO and *Pcl2* KO cell lines in regions centered on 7,796 SUZ12 peak regions identified in WT mESCs. The preparation of these ChIP-seq data was completed separately from data summarized in Figure S1D and quantitative comparisons between the two datasets are difficult due to the variability of the method.

Figure S2 - Højfeldt et al.

A

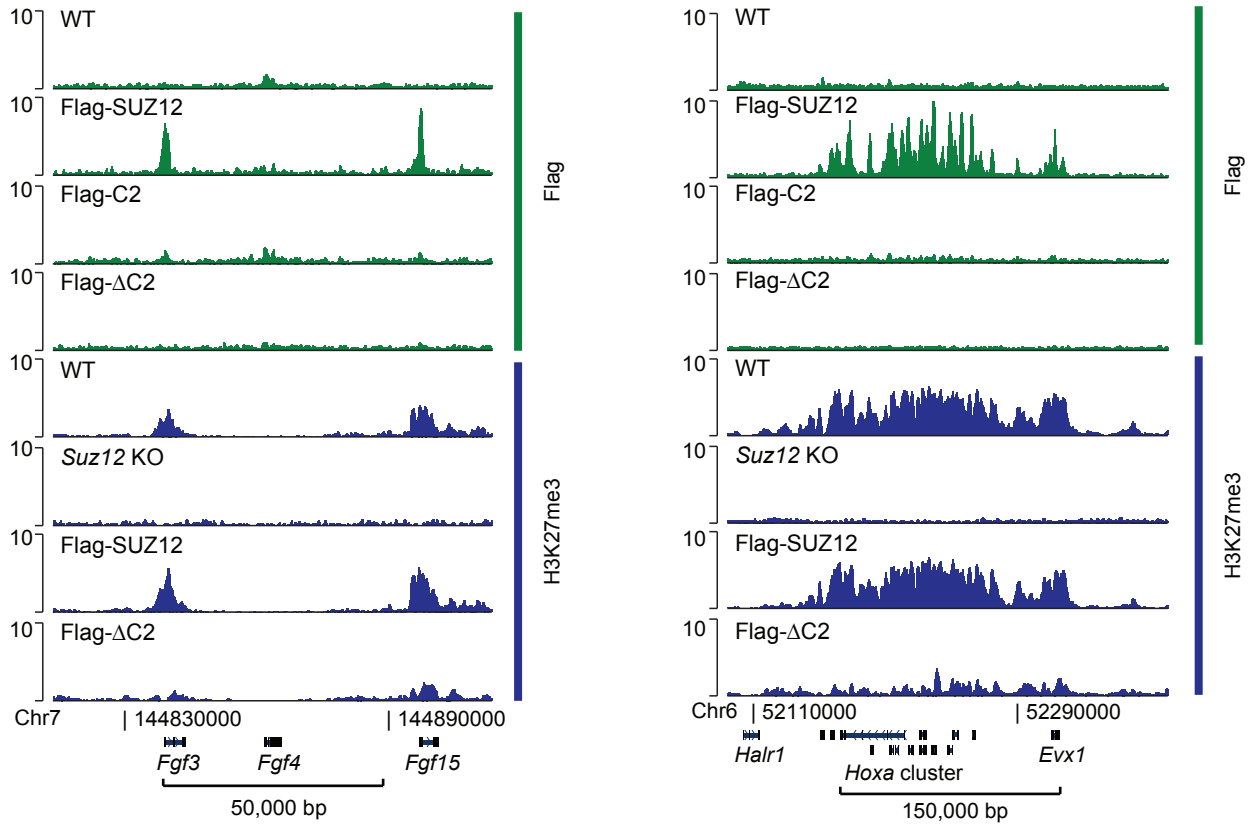

B

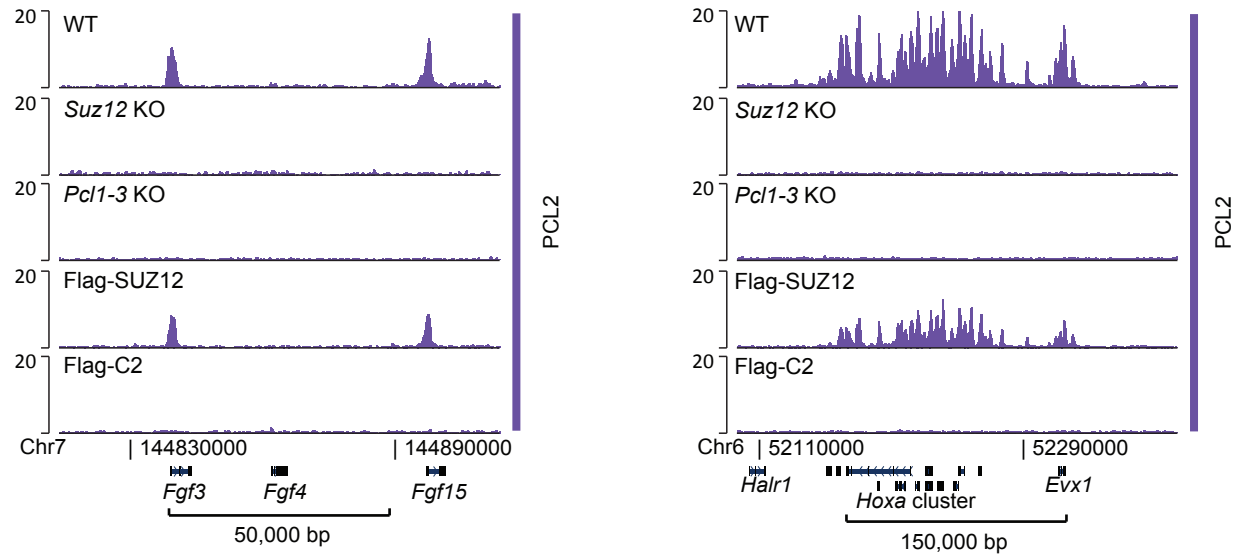

C

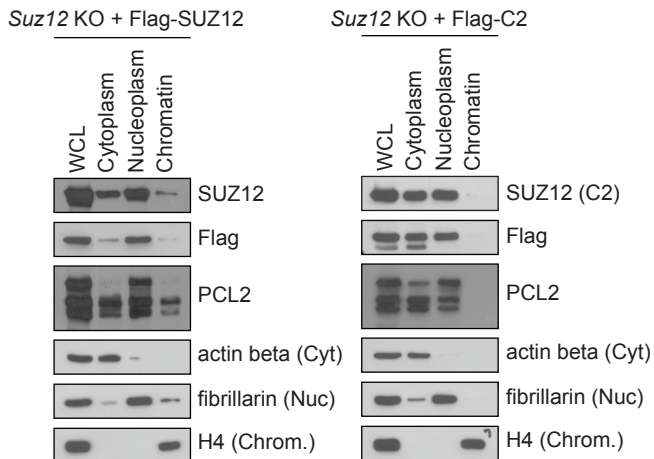

**Figure S2: PCL2 binding to PRC2 target sites is dependent on SUZ12. Related to Figure 2.**

A) Flag and H3K27me3 ChIP-seq signals (RPKM) from indicated cell lines within representative genomic regions.

B) PCL2 ChIP-seq signals (RPKM) from indicated cell lines within representative genomic regions.

C) Western blot for SUZ12, Flag, PCL2 and marker proteins of cellular fractions from cellular fractionation experiments using the indicated cell lines. WCL (whole-cell-lysate), cytosolic fraction, nucleoplasmic fraction, and nuclear insoluble fraction (chromatin) were loaded corresponding to equal number of cells.

Figure S3 - Højfeldt et al.

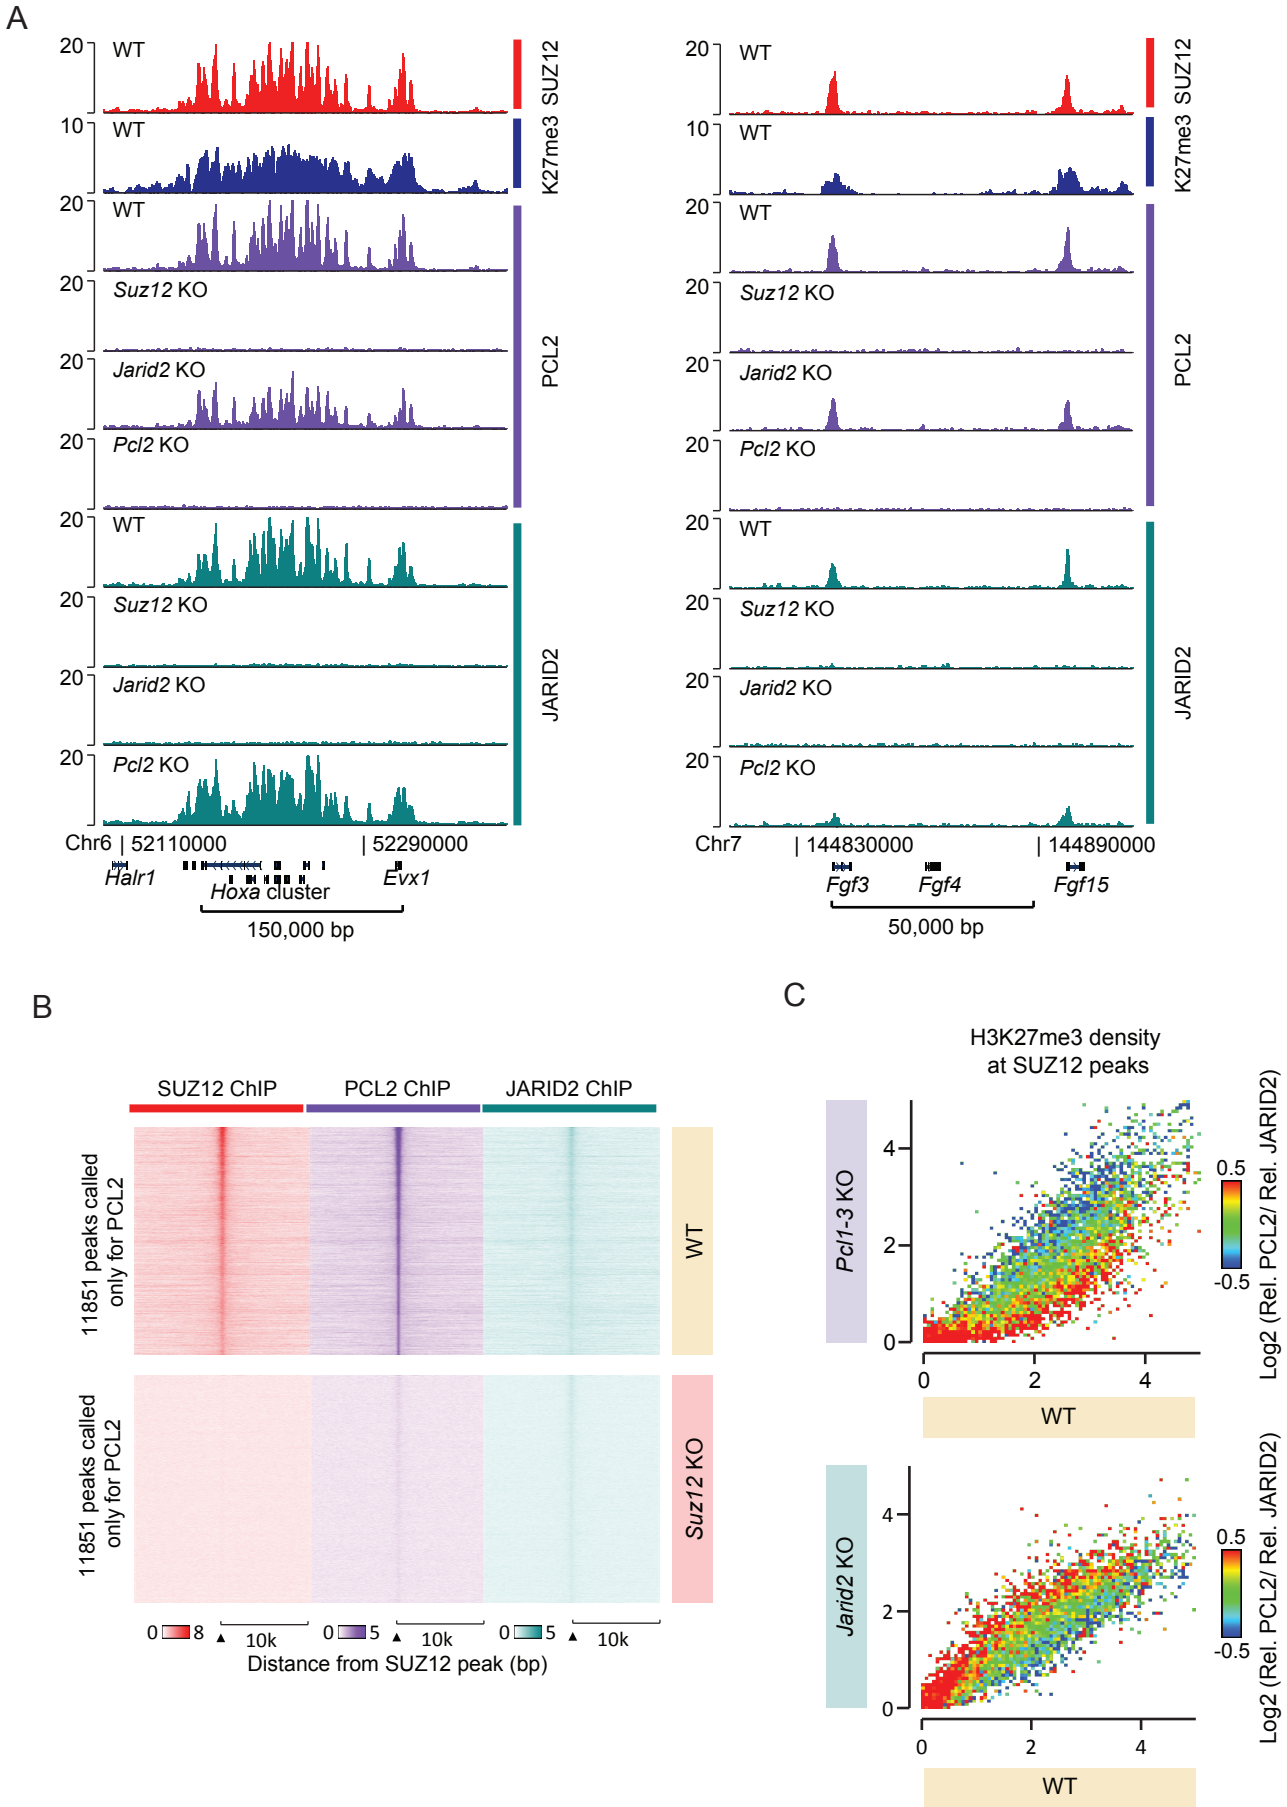

**Figure S3: PRC2.1 and PRC2.2 – differential number of called peaks primarily result from differential signal-to-noise in CHIP experiments. Related to Figure 3.**

A) SUZ12, K3K27me3, PCL2 and JARID2 ChIP-seq signals (RPKM) from indicated cell lines within representative genomic regions.

B) Heatmaps of SUZ12, PCL2 and JARID2 ChIP-seq signals (RPKM) from indicated cell lines at 11,851 PCL2 peaks that were not called as SUZ12 peaks. Horizontal axis shows a 20,000 bp window centered on PCL2 peaks.

C) Scatterplots comparing H3K27me3 signals (RPKM) within each SUZ12 peak (called in WT cells) for WT mESCs (x-axis) versus *Pcl1-3* KO mESCs (y-axis top plot) or *Jarid2* KO mESCs (y-axis bottom plot). Each point in the scatterplot is pseudocolored according to the balance between relative ChIP-seq signal strength generated with PCL2 and JARID2 antibodies (PCL2 signal relative to average PCL2 signal) / (JARID2 signal relative to average JARID2 signal).

Figure S4 - Højfeldt et al.

A

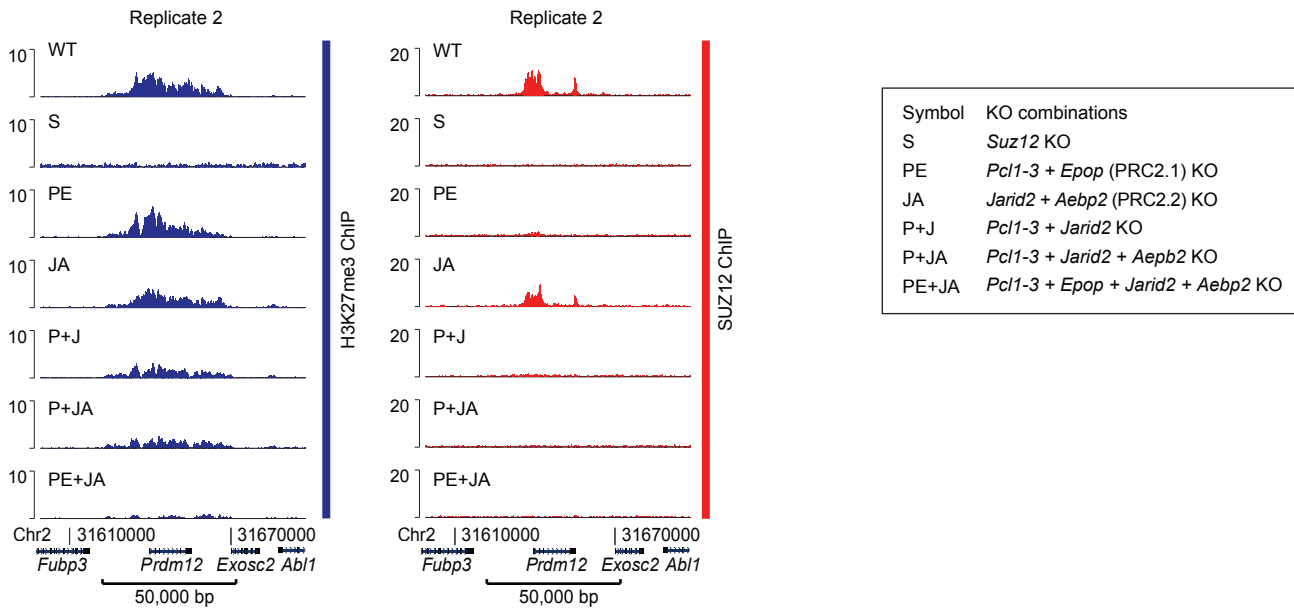

B

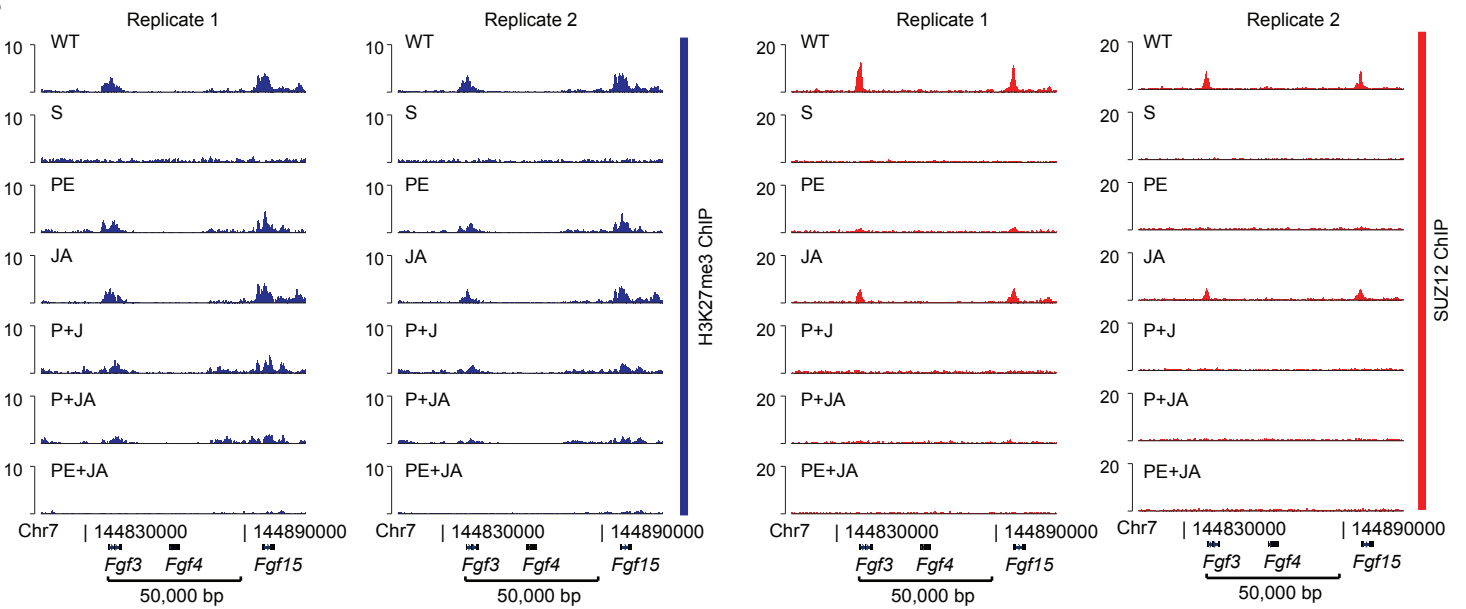

C

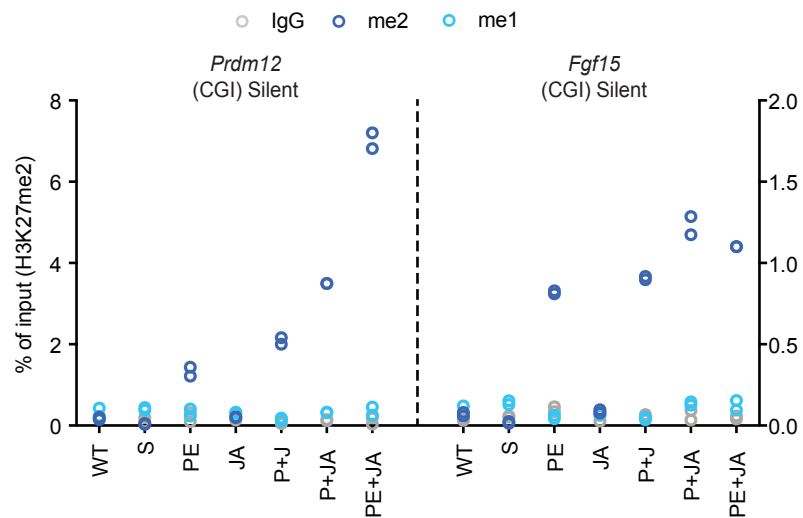

D

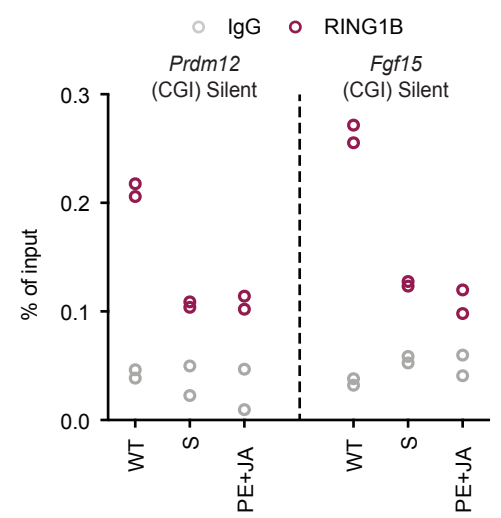

**Figure S4: PRC2 non-core subunits are collectively required for PRC2 binding. Related to Figure 4.**

A) H3K27me3 and SUZ12 ChIP-seq signals (RPKM) from indicated cell lines within a representative genomic region that includes the PRC2 target gene *Prdm12*. Data is from a replicate experiment (Replicate 2) of that shown in Figure 4C (Replicate 1).

B) H3K27me3 and SUZ12 ChIP-seq signals (RPKM) from indicated cell lines in a region including the *Hoxa* gene cluster for. Data from two replicate experiments are shown.

C) ChIP-qPCR signals (% of input) for H3K27me2 (left) and H3K27me1 (right) compared to IgG control (gray) in the indicated cell lines at PRC2 target sites (CGI promoters of *Prdm12* and *Fgf15*). The ChIP-qPCR values are from a single biological ( $n = 1$ ) experiment with two technical replicate values shown.

D) ChIP-qPCR signals (% of input) for RING1B compared to IgG control (gray) in the indicated cell lines at PRC2 target sites (CGI promoters of *Prdm12* and *Fgf15*). The ChIP-qPCR values are from a single biological ( $n = 1$ ) experiment with two technical replicate values shown.



Figure S5 - Højfeldt et al.

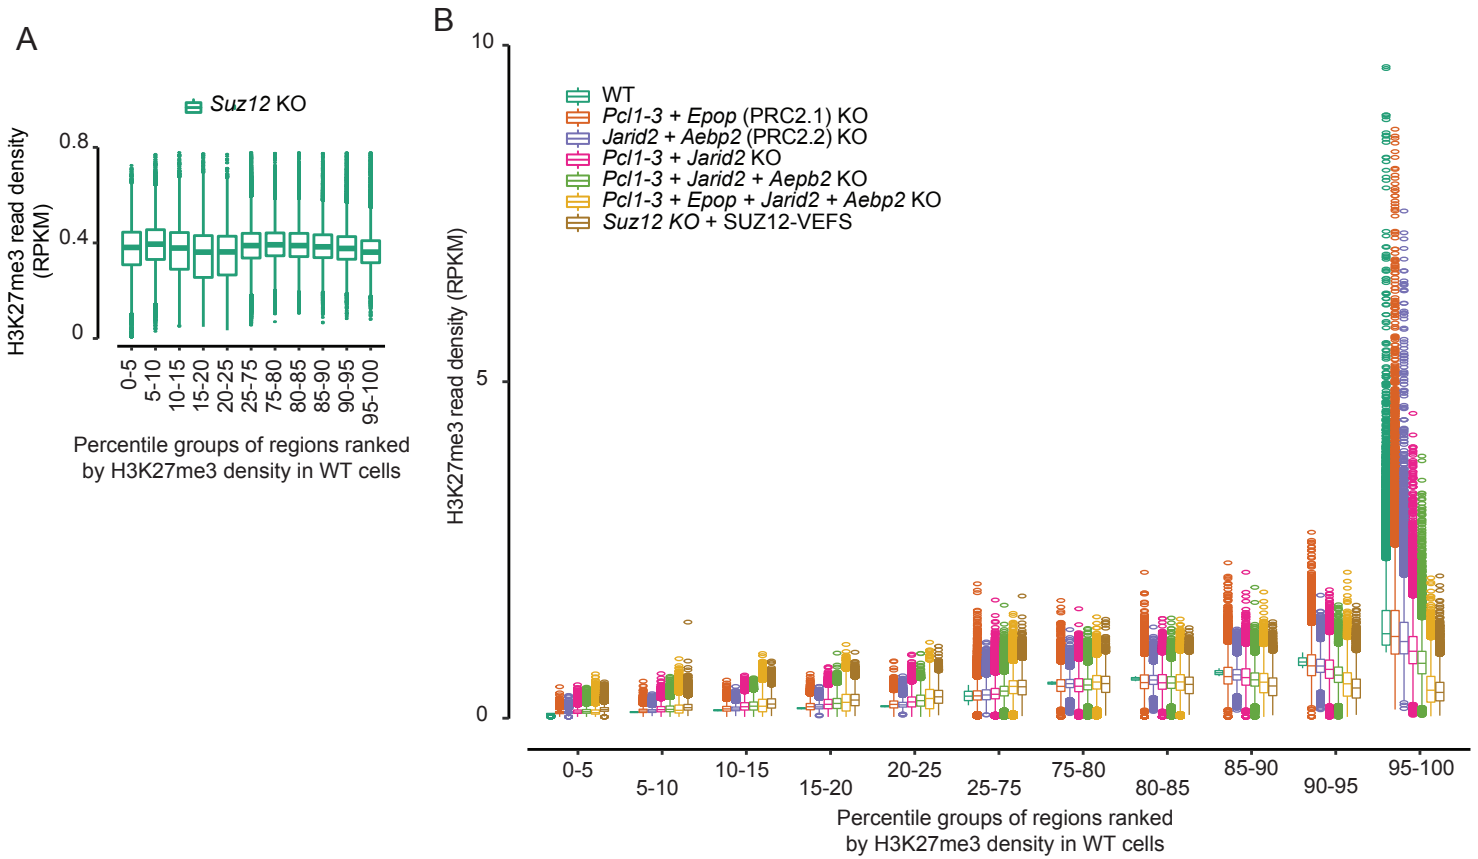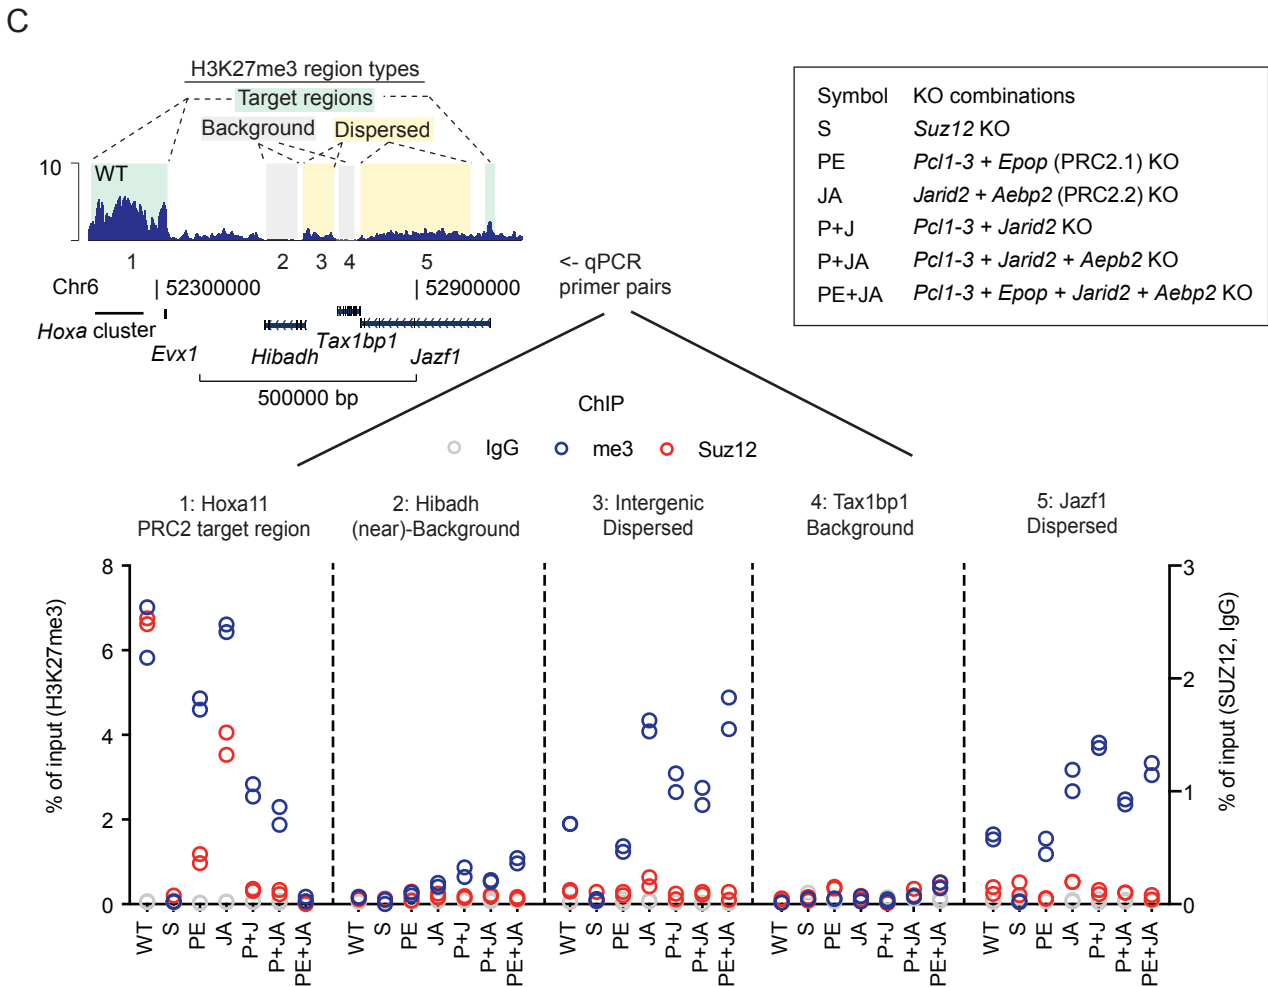

**Figure S5: Dispersed and recruitment dependent populations of H3K27me3. Related to Figure 5.**

A) Box plot of H3K27me3 read densities (RPKM) for *Suz12* KO cells within 5 percentile regions or the middle 50 percentile regions shown in Figure 5A. Boxes extend from first to third quartile with a band marking the median. Whiskers extend to values up to 1.5 interquartile distances from box, and all additional values outside of this range are marked with circles.

B) Box plot of same cell lines as in Figure 5B but with inclusion of all 5 percentile regions.

C) ChIP-qPCR signals (% of input) for H3K27me3 (blue, left y-axis scale), SUZ12 (red), and IgG control (gray) (right y-axis scale) in the indicated cell lines at sites indicated under ChIP-seq track (top left). Above qPCR data is indicated the type of H3K27me3 region probed by the qPCR primers (PRC2 target region, dispersed or background level). The ChIP-qPCR values are from a single biological ( $n = 1$ ) experiment with two technical replicate values shown.

Figure S6 - Højfeldt et al.

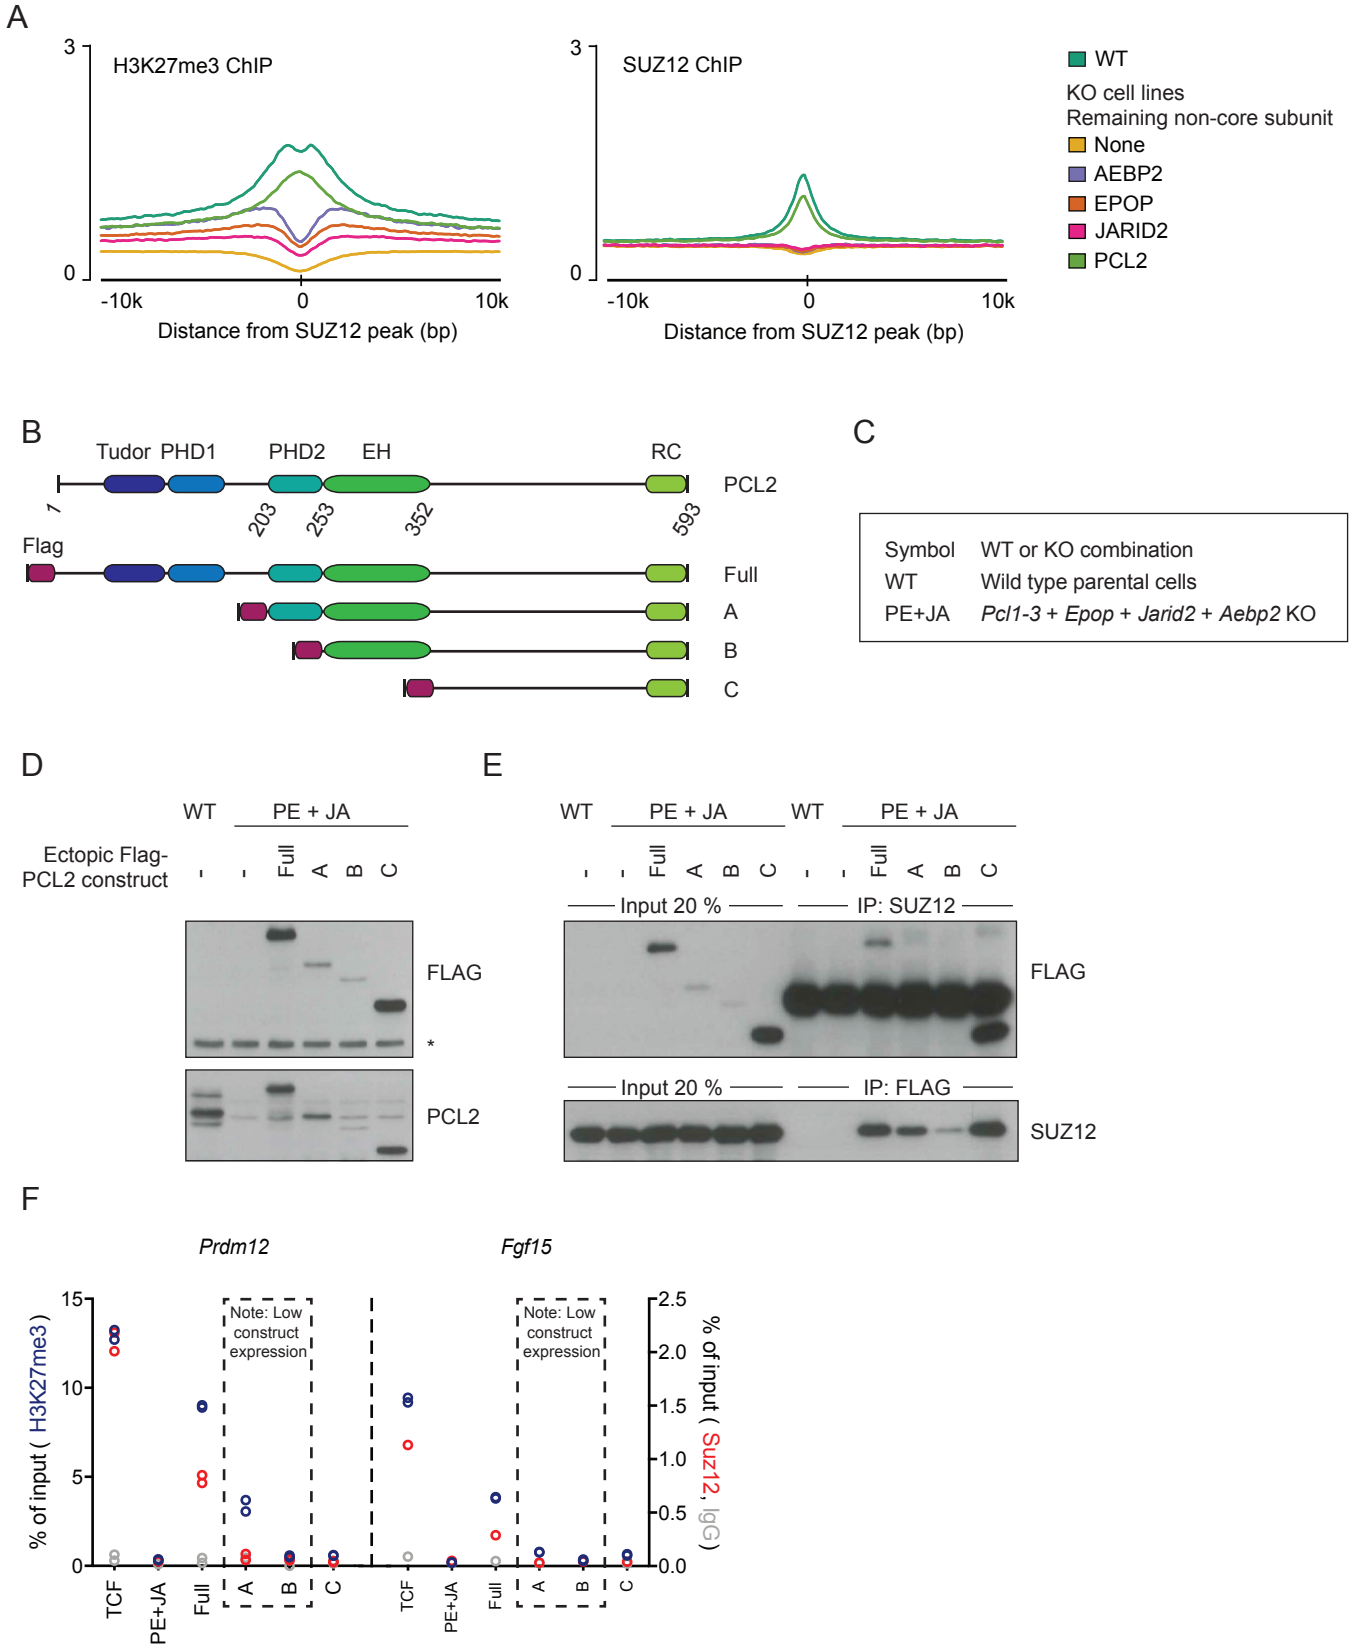

**Figure S6: Each of the non-core PRC2 subunits contributes to target specific H3K27me3.  
Related to Figure 6.**

A) Mean H3K27me3 (left) and SUZ12 (right) ChIP-seq signals (RPKM) for the indicated cell lines in regions centered on 7,796 SUZ12 peak regions identified in WT mESCs.

B) Schematic drawing of PCL2 with colored domains (Top) and of expression constructs of PCL2 fragments used in rescue experiments (Bottom). Boundaries (amino acid numbers) for the fragments used in this study are indicated.

C) Symbols for cell lines used in Figure S6D-F.

D) Western blot for PCL2 and Flag of cell extracts prepared from the indicated cell lines.

E) Western blot for PCL2 and Flag of cell extracts (input) and anti-Flag or anti-SUZ12 immunoprecipitated (IP) material from the indicated cell lines (wildtype mESC (WT) or non-core subunit knockout mESC (PE+JA) with ectopic expression of Flag-tagged PCL2 fragments). Fragment boundaries are shown in Figure S6B.

F) ChIP-qPCR signals for H3K27me3 (blue, left y-axis scale), SUZ12 (red), and IgG control (gray) (right y-axis scale) in WT and non-core subunit KO cell lines expressing PCL2 fragments. The regions probed are PRC2 target sites (CGI promoters of *Prdm12* and *Fgf15*). Data values are from a single biological ( $n = 1$ ) experiment with two technical replicate values shown.

Figure S7 - Højfeldt et al.

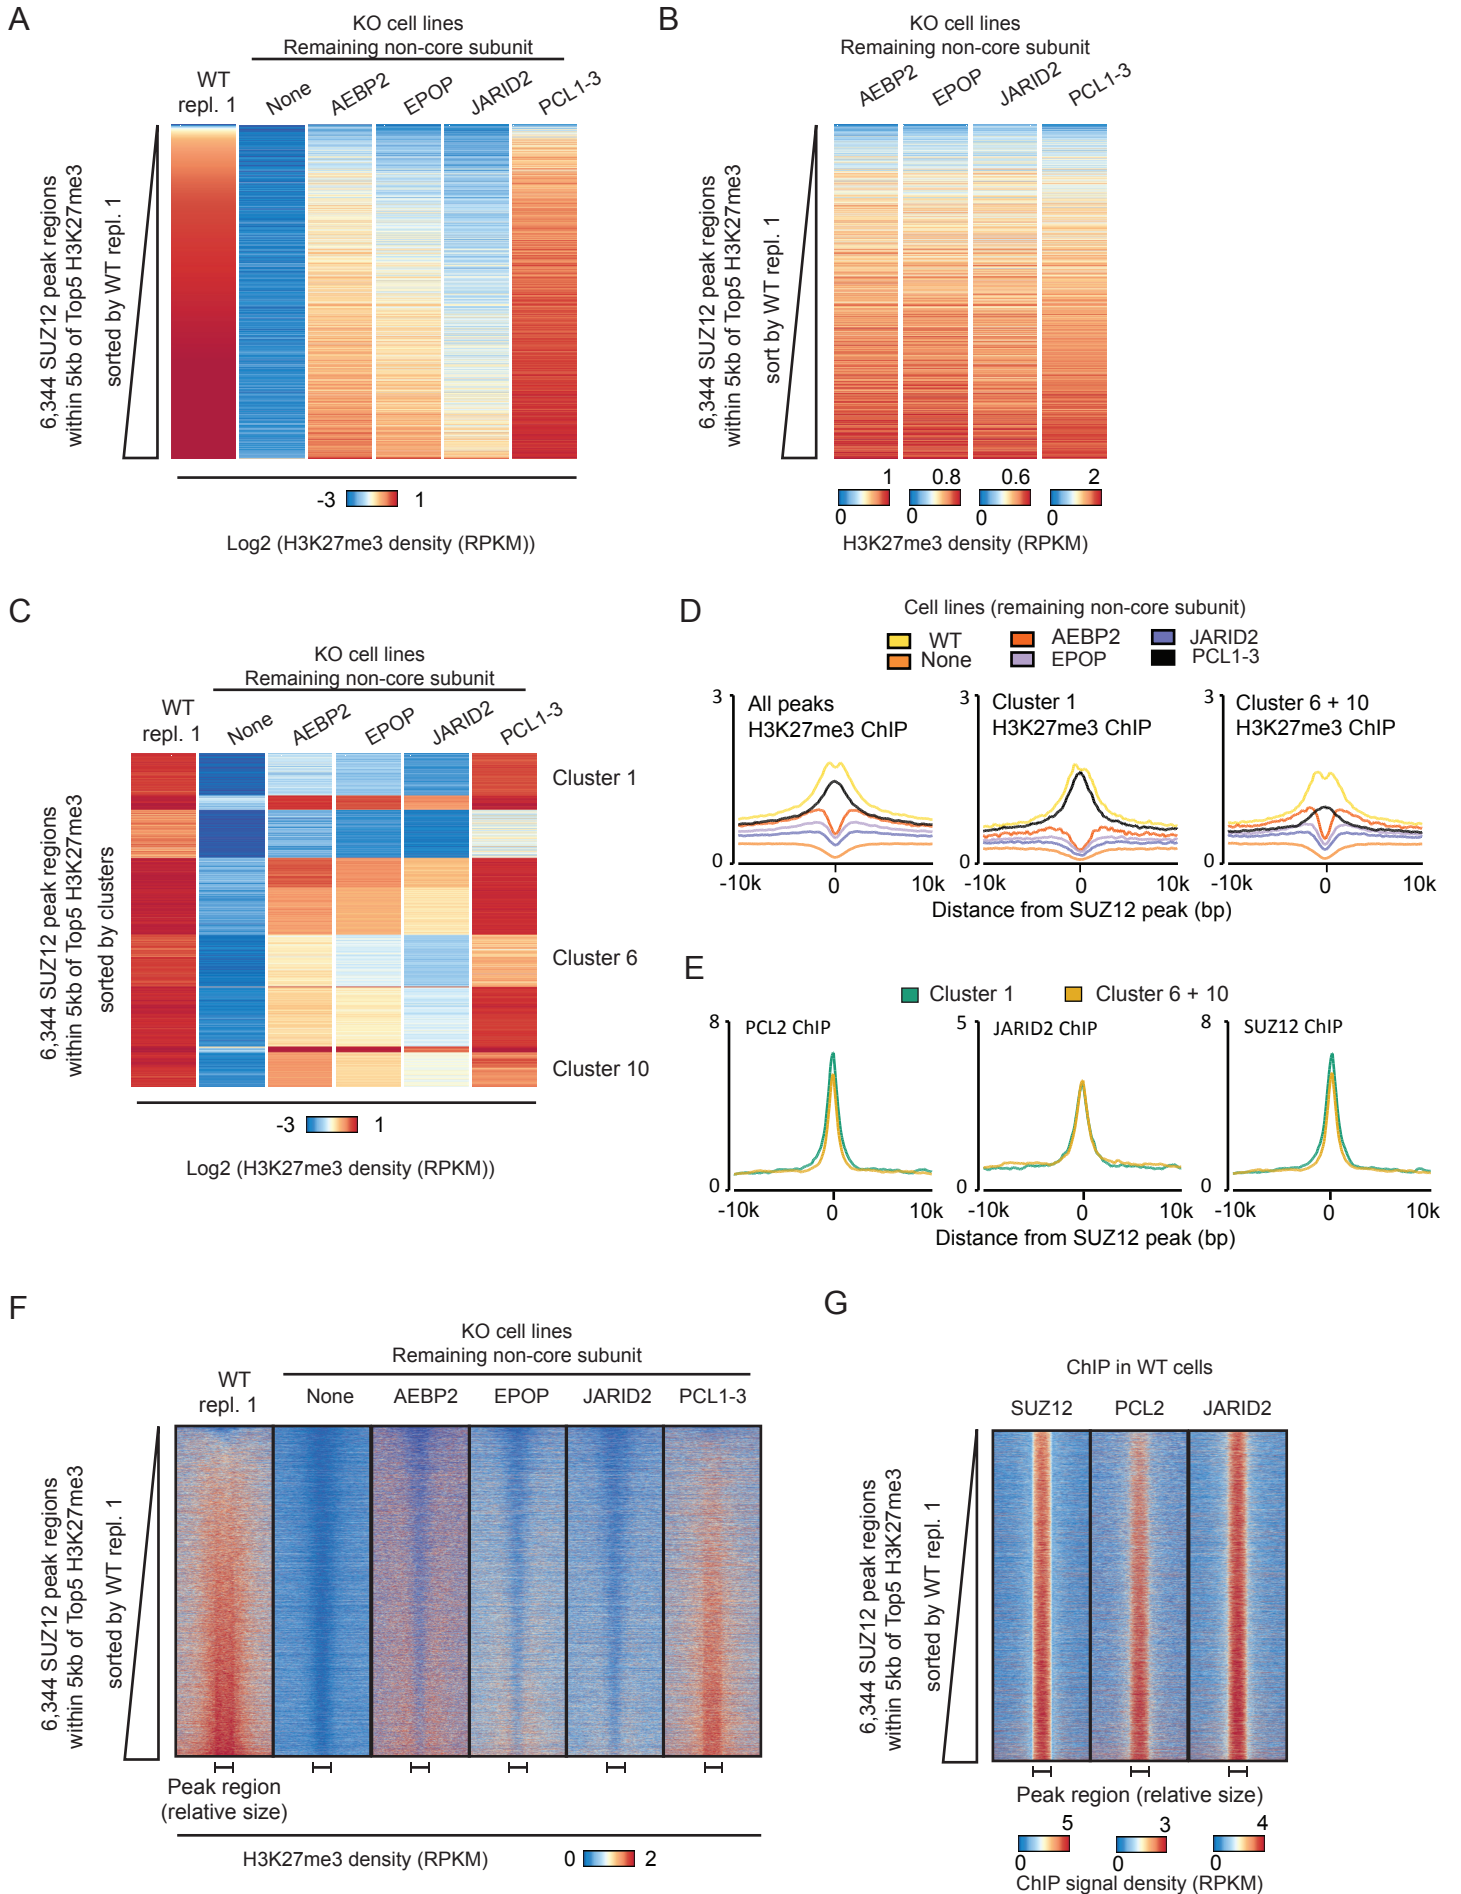

**Figure S7: The non-core PRC2 subunits contribute to a shared set of regions but produce different H3K27me3 distributions within the regions. Related to Figure 6.**

A) Heatmaps of the H3K27me3 ChIP-signal (RPKM) for indicated cell lines in SUZ12 peak regions (+/- 500bp) that lie within 5kb of a Top5 H3K27me3 region (Figure 5A). Lines in heatmaps are sorted by signal density in WT cells (replicate 1).

B) Heatmaps for four cell lines as in Figure S7A, but with individually scaled coloring as indicated below graph.

C) Heatmaps of the H3K27me3 ChIP-signal (RPKM) for indicated cell lines in SUZ12 peak regions (+/- 500bp) that lie within 5kb of a Top5 H3K27me3 region (Figure 5A). Lines of heatmaps are sorted by clusters identified by k-means clustering.

D) Mean H3K27me3 ChIP-seq signals (RPKM) for indicated cell lines in regions centered on SUZ12 peak regions overlapping Top5 H3K27me3 regions (right), cluster 1 (middle) and cluster 6 + 10 (right).

E) Mean PCL2 (left), JARID2 (middle) and SUZ12 (right) ChIP-seq signals (RPKM) for indicated cell lines in regions centered on SUZ12 peak regions overlapping cluster 1 (green) or cluster 6 + 10 (yellow).

F) Heatmaps of the H3K27me3 ChIP-signal (RPKM) for indicated cell lines across SUZ12 peak regions. Lines in heatmaps are sorted by signal density in WT cells (replicate 1) and are displayed with a length relative to the peak width (window is 5 peak widths wide) centered on peaks.

G) Heatmaps of the SUZ12 (left), PCL2 (middle) and JARID2 (right) ChIP-signal (RPKM) for indicated cell lines across SUZ12 peak regions. Lines in heatmaps are sorted by H3K27me3 signal density in WT cells (replicate 1) and are displayed with a length relative to the peak width (window is 5 peak widths wide) centered on peaks.

**Table S1. Overview of mESC lines used in this study. Related to STAR Methods.**

| ID/Genotype (strain)                                                                        | Short ID | Source (Reference)                                   |                   |                   |                                              |
|---------------------------------------------------------------------------------------------|----------|------------------------------------------------------|-------------------|-------------------|----------------------------------------------|
| <b>Published mESC lines</b>                                                                 |          |                                                      |                   |                   |                                              |
| TCF2.2 / WT (129B6F1)                                                                       | WT       | Transgenic core, UCPH (Martin Gonzalez et al., 2016) |                   |                   |                                              |
| <i>Suz12</i> KO                                                                             | S        | Helin lab (Hojfeldt et al., 2018)                    |                   |                   |                                              |
| ID/Genotype                                                                                 | Short ID | Parental line                                        | Knockout strategy | Target exon(s)    | gRNA sequences                               |
| <b>Knockout cell lines generated in this study, all derived from wildtype (TCF2.2 / WT)</b> |          |                                                      |                   |                   |                                              |
| <i>Aebp2</i> KO                                                                             | A        | WT                                                   | Frameshift        | Exon 2            | ACGCTGACCATCGACATGTA                         |
| <i>Epop</i> KO                                                                              | E        | WT                                                   | Frameshift        | Exon1             | CGAGCAGGGAGACCCCCGCG                         |
| <i>Jarid2</i> KO                                                                            | J        | WT                                                   | Frameshift        | Exon 3            | ATGACAGCGATGGGATCCCG                         |
| <i>Pcl2</i> KO                                                                              | P2       | WT                                                   | Deletion          | Exon 2<br>Exon 15 | GACGTAAAGGAGACCGCTTG<br>CTCGTCGGGTGACGCTTGAT |
| <i>Pcl1-2</i> KO                                                                            | P21      | P2                                                   | Deletion          | Exon 3<br>Exon 15 | ACTGGAATCGTCCTCAAAC<br>TGCTCGAAGAGTGCGGCCTG  |
| <i>Pcl1-3</i> KO                                                                            | P213 / P | P21                                                  | Deletion          | Exon 2<br>Exon 15 | AGGTAATATAGCCCGTCTGT<br>GGTCTGAGCAGCCGGATGA  |
| <i>Jarid2-del</i> KO                                                                        | J-d      | WT                                                   | Deletion          | Exon 3<br>Exon 17 | ATGACAGCGATGGGATCCCG<br>TCCCCGCAAGAGAGCGACCG |
| <i>Jarid2 + Aebp2</i> KO                                                                    | JA       | J-d                                                  | Deletion          | Exon 1<br>Exon 9  | GGGTGCTGCAAACCGACCGC<br>ACTACTGTGGCCAACCCGAA |
| <i>Pcl1-3 + Epop</i> KO                                                                     | PE       | P                                                    | Frameshift        | Exon1             | CGAGCAGGGAGACCCCCGCG                         |
| <i>Pcl1-3 + Jarid2</i> KO                                                                   | P + J    | P                                                    | Deletion          | Exon 3<br>Exon 17 | ATGACAGCGATGGGATCCCG<br>TCCCCGCAAGAGAGCGACCG |
| <i>Pcl1-3 + Jarid2 + Aebp2</i> KO                                                           | P + JA   | P + J                                                | Deletion          | Exon 1<br>Exon 9  | GGGTGCTGCAAACCGACCGC<br>ACTACTGTGGCCAACCCGAA |
| <i>Pcl1-3 + Jarid2 + Aebp2 + Epop</i> KO                                                    | PE + JA  | P + JA                                               | Deletion          | Exon 1<br>Exon 1  | AGGGCCGCGTGACGATACCG<br>ACTGTCATTTGAGGTCCCGC |
| <i>Pcl1-3 + Epop + Aebp2</i> KO                                                             | PE + A   | PE                                                   | Deletion          | Exon 1<br>Exon 9  | GGGTGCTGCAAACCGACCGC<br>ACTACTGTGGCCAACCCGAA |
| <i>Pcl1-3 + Epop + Jarid2</i> KO                                                            | PE + J   | PE                                                   | Deletion          | Exon 3<br>Exon 17 | ATGACAGCGATGGGATCCCG<br>TCCCCGCAAGAGAGCGACCG |
| <i>Jarid2 + Aebp2</i> KO + <i>Epop</i> KO                                                   | E + JA   | JA                                                   | Deletion          | Exon 1<br>Exon 1  | AGGGCCGCGTGACGATACCG<br>ACTGTCATTTGAGGTCCCGC |

**Table S2. Overview of antibodies used in this study. Related to STAR Methods.**

| Target                       | ID          | Type       | Epitope       | Use      | Source/Cat no.           |
|------------------------------|-------------|------------|---------------|----------|--------------------------|
| <b>Core PRC2</b>             |             |            |               |          |                          |
| SUZ12                        | D39F6       | Rabbit mAb | Around aa260  | WB, ChIP | Cell Signaling #3737     |
| EZH2                         | BD43        | Rabbit mAb | N-terminal    | WB       | Helin lab                |
| EED                          | AA19.30     | Mouse mAb  |               | WB       | Helin lab                |
| <b>Non-core PRC2</b>         |             |            |               |          |                          |
| RBBP4                        | 11G10       | Mouse mAb  | aa1-425       | WB       | Abcam #230518            |
| AEBP2                        | D7C6X       | Rabbit mAb | Around aa1114 | WB       | Cell Signaling #14129    |
| EPOP                         | 61753       | Rabbit pAb | aa59-229      | WB       | Active Motif #61753      |
| JARID2                       | D6M9X       | Rabbit mAb | Around aa345  | WB, ChIP | Cell Signaling #13594    |
| PCL2                         | 16208-1-AP  | Rabbit pAb |               | WB, ChIP | Protein Tech #16208-1-AP |
| <b>Histone modifications</b> |             |            |               |          |                          |
| H3K27me3                     | C36B11      | Rabbit mAb |               | WB, ChIP | Cell Signaling #9733     |
| H3K27me2                     | D18C8       | Rabbit mAb |               | WB, ChIP | Cell Signaling #9728     |
| H3K27me1                     | MABI0321    | Mouse mAb  |               | WB, ChIP | Active Motif #61016      |
| H4                           | 07-108      | Rabbit pAb |               | WB       | Millipore #07-108        |
| <b>Others</b>                |             |            |               |          |                          |
| Flag                         | M2          | Mouse mAb  | DYKDDDDK      | IP       | Sigma-Aldrich #A2220     |
|                              | SAB1306078  | Rabbit pAb |               | WB       | Sigma-Aldrich #F7425     |
| Beta actin                   | AB8226      | Mouse mAb  |               | WB       | Abcam #ab8226            |
| Fibrillarin                  | EPR10823(B) | Rabbit mAb |               | WB       | Abcam #ab166630          |
| RING1B                       | D22F2       | Rabbit mAb |               | ChIP     | Cell Signaling #5694     |



**Table S3. Overview of primer sequences used for ChIP-qPCR. Related to STAR Methods.**

| <b>Locus</b>                                          | <b>Forward primer</b> | <b>Reverse primer</b> |
|-------------------------------------------------------|-----------------------|-----------------------|
| <b>PRC2 target CGIs</b>                               |                       |                       |
| <i>Prdm12</i>                                         | CACCGCAGCTTAAGGAGTGA  | AGCCCAGTACTCTGTCCGAT  |
| <i>Fgf15</i>                                          | GCAGTACCTGTACTCCGCTG  | GTTTTGGTCCTCCTCGCAGT  |
| <i>HoxA11-13</i>                                      | CGCCGAGGACTTGACCTTTA  | CTGTCTGCTATTGGGTGGCA  |
| <b>CGI promoter of active gene</b>                    |                       |                       |
| <i>Fgf4</i>                                           | TAGTCTCGGGGGCTGAGTAG  | GAATTCCGCACCGAGAGACC  |
| <b>Non-CGI intra- and inter-genic regions regions</b> |                       |                       |
| <i>Fubp3</i>                                          | GCTGGAAGTCCTCAAGCAGT  | ACACTTGTTAGCGAGGGTGG  |
| <i>Hibadh</i>                                         | CAAGGTCAAGGCTGCTCGTA  | TAGTCGTTTTTGTGGCGGC   |
| <i>Hibadh-Tax1bp1<br/>intergenic</i>                  | GACAGCCCTTCACTGGGTTT  | CTTCGGGGTGCTGACAGATT  |
| <i>Tax1bp1</i>                                        | TCTGCCATATGGGGTCTGGA  | GACCATGGGGCTGGAAAAGA  |
| <i>Jazf1</i>                                          | TATGGATGGAGGGACTGGCA  | GAGGCACAGATGGAGCTTGT  |
